# Supplementary material
Source: Springer Nature journal article supplement (https://www.springermedizin.de/resource/supplementary/12990_2009_204_MOESM1_ESM.pdf/9612784)

**A** Normal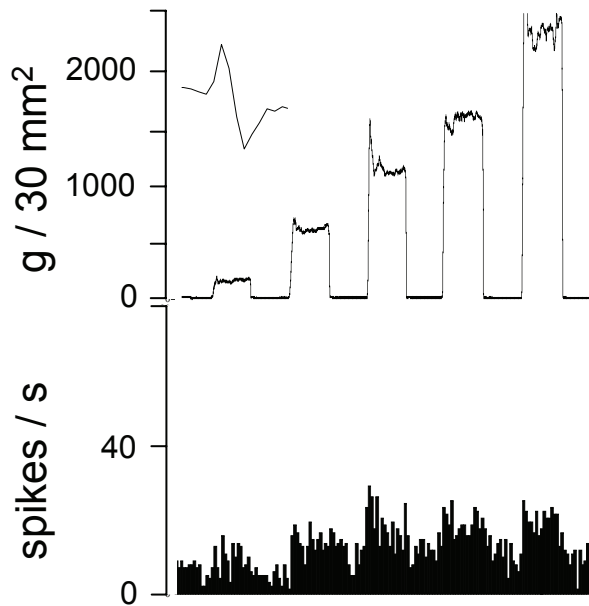**B** Arthritis 5h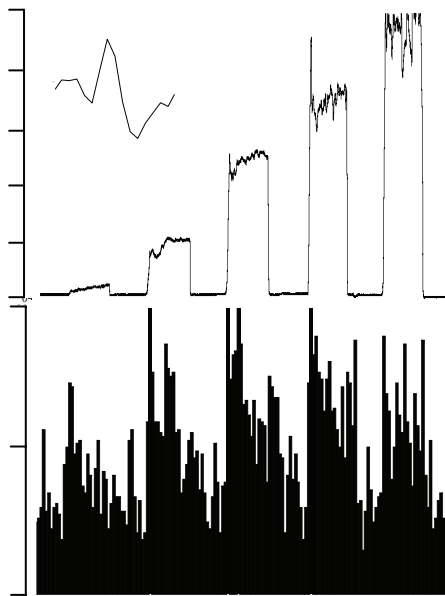**C** Ro-256981 (10  $\mu$ M)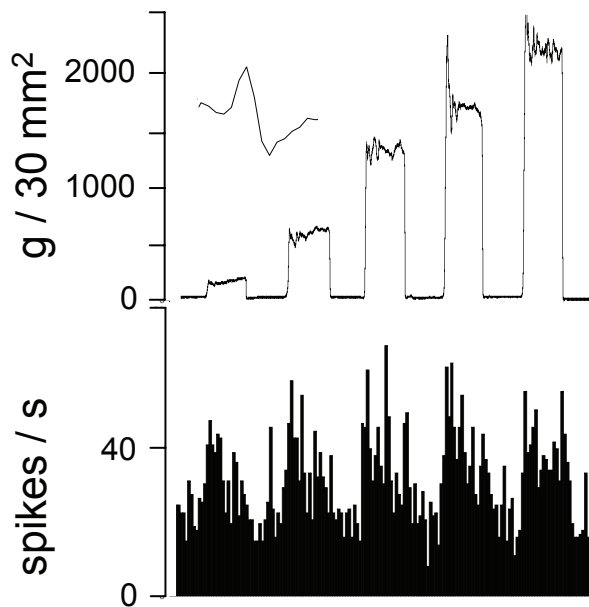**D** Wash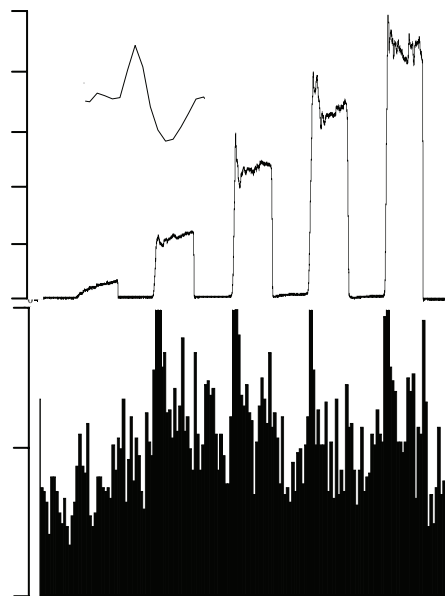

Supplement: MOESM1 [file 9612784]
